# Supplementary material
Source: PubMed Central journal article supplement (PMC3255577)
Supplement: mt2011212x8.pdf [file mt2011212x8.pdf]

## Supplementary Table S1

### Sequences

| siRNA target                    | Sense Strand (5'→3')    |
|---------------------------------|-------------------------|
| <i>Luc</i> (21-nt)              | UAAGGCUAUGAAGAGAUACdTdT |
| <i>Luc</i> (16-nt)              | UAAGGCUAUGAAGAdTdT      |
| <i>hVegfa</i>                   | ACCUCACCAAGGCCAGCACdTdT |
| <i>mVegfa</i>                   | ACCUCACCAAAGCCAGCACdTdT |
| <i>Vegfr1</i> (mouse and human) | CUGAGUUUAAAAGGCACCCdTdT |

### Chemical Modifications

| Modification       | Sense Strand (5'→3')                                     | Antisense Strand                                          |
|--------------------|----------------------------------------------------------|-----------------------------------------------------------|
| <i>Cholesterol</i> | 3' conjugation                                           | Unmodified                                                |
| <i>2'O-Me</i>      | Alternating substitutions starting with first nucleoside | Alternating substitutions starting with second nucleoside |
| <i>Biotin</i>      | 5' conjugation                                           | Unmodified                                                |
