# Supplementary material
Source: PubMed Central journal article supplement (PMC3255577)

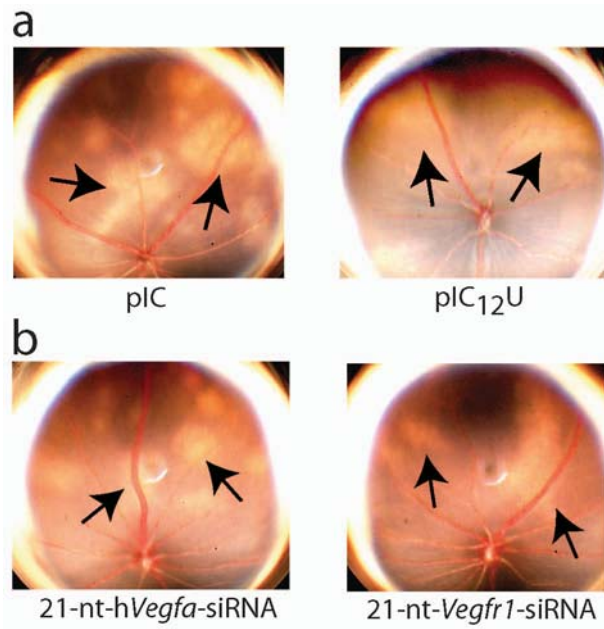

Supplement: mt2011212x1.pdf [file mt2011212x1.pdf]

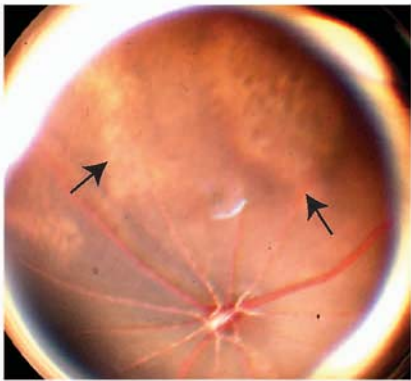

Cholesterol 21-nt-*Luc*-siRNA

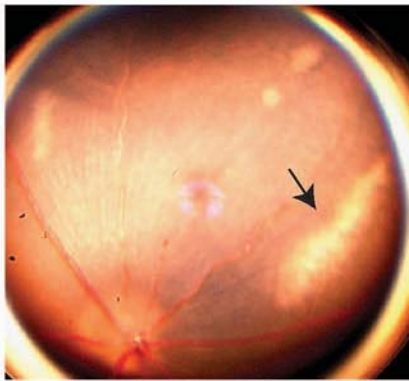

Cholesterol 21-nt-m*Vegfa*-siRNA

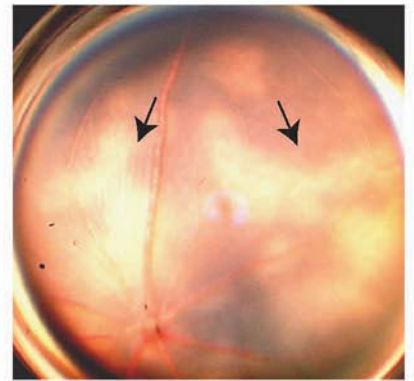

Cholesterol 21-nt-*Vegfr1*-siRNA

Supplement: mt2011212x2.pdf [file mt2011212x2.pdf]

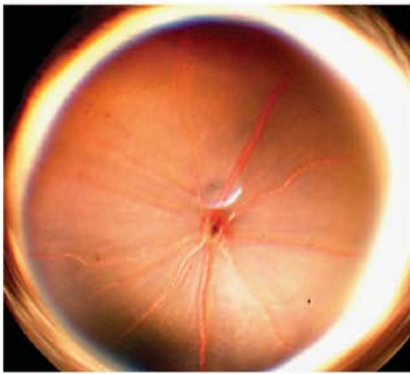

Baseline

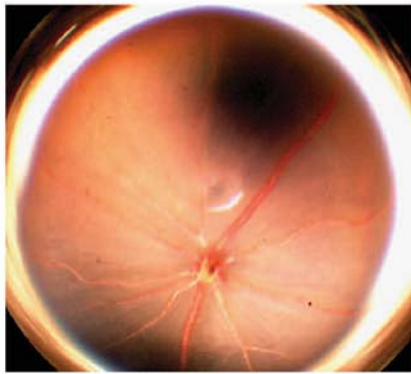

1 week

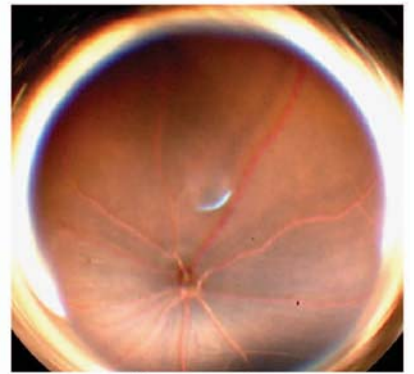

2 weeks

Supplement: mt2011212x3.pdf [file mt2011212x3.pdf]

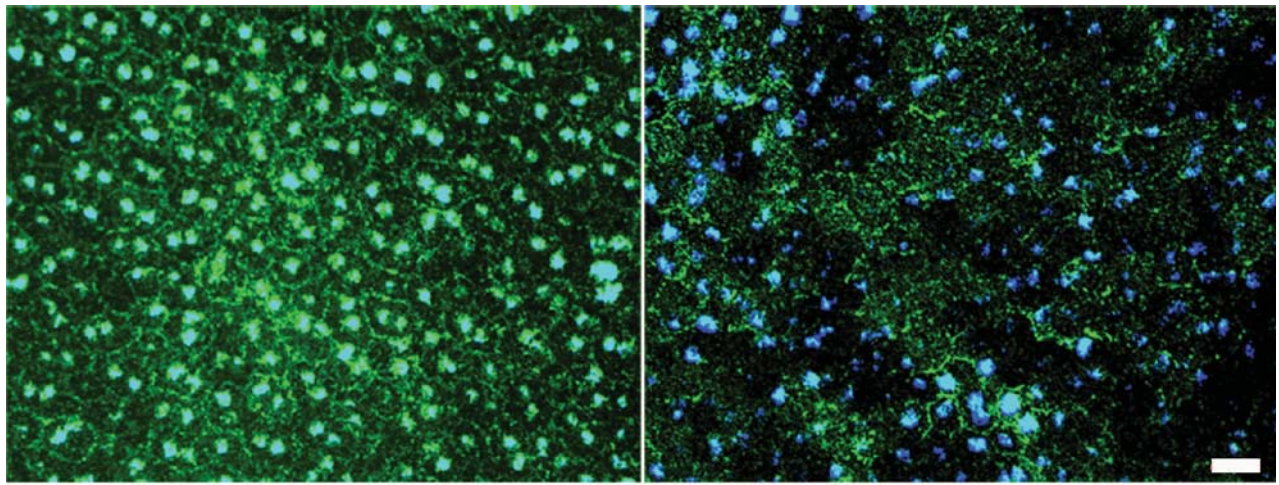

PBS

21-nt-*Luc*-siRNA

Supplement: mt2011212x4.pdf [file mt2011212x4.pdf]

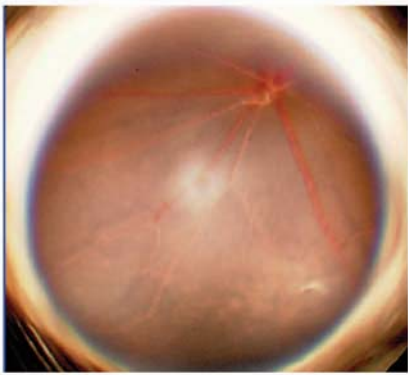

PBS

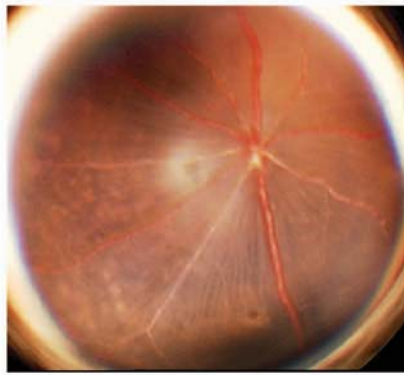

3p-RNA

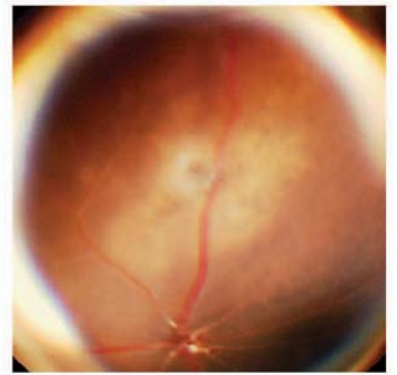

Poly I:C

Supplement: mt2011212x5.pdf [file mt2011212x5.pdf]

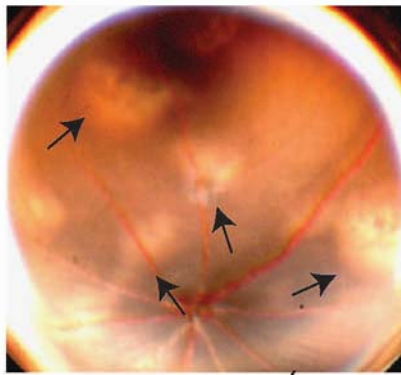

*mda5*<sup>-/-</sup>

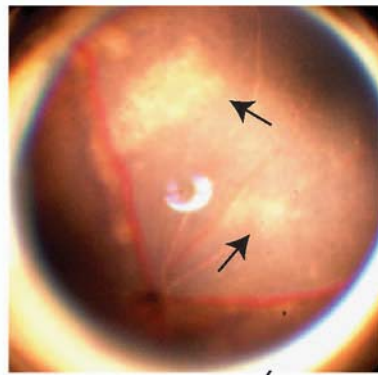

*pkr*<sup>-/-</sup>

Supplement: mt2011212x6.pdf [file mt2011212x6.pdf]

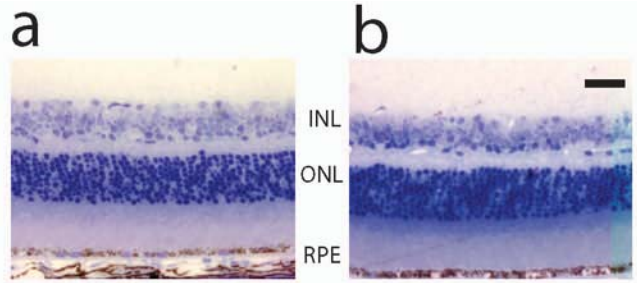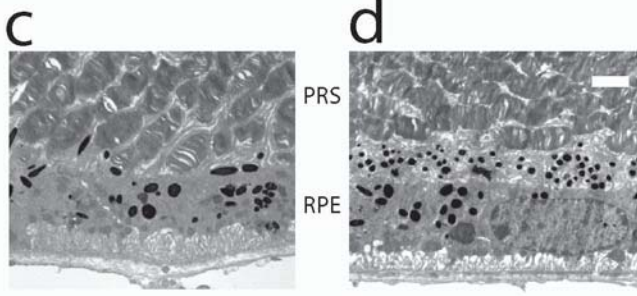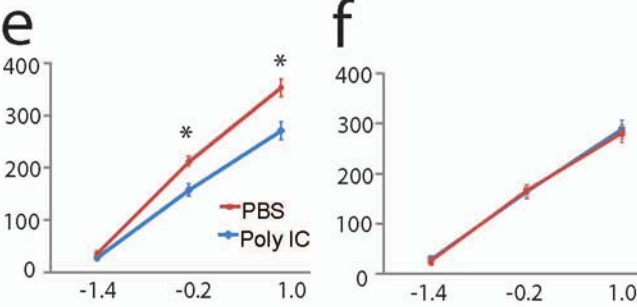

Supplement: mt2011212x7.pdf [file mt2011212x7.pdf]
